RESEARCH ARTICLE

# Complete genome and functional insights into *Microbacterium* sp. strain FBCC-B4120, a novel freshwater isolate with diverse biotechnological traits

Jina Kim<sup>1,2</sup>, Hyaekang Kim<sup>3</sup>, Jaeduk Goh<sup>4</sup>, Chun-Zhi Jin<sup>5</sup>, Hyung-Gwan Lee<sup>5</sup>, Chang Soo Lee<sup>6</sup>, Sanghwa Park<sup>3</sup>, Eu Jin Chung<sup>3</sup>, Yejin Park<sup>3</sup>, Seungmin Shin<sup>3</sup>, Youngmin Han<sup>7</sup>, Woori Kwak<sup>1,8\*</sup>

**1** Department of Biotechnology, The Catholic University of Korea, Bucheon, Republic of Korea, **2** Department of Agricultural Biotechnology and Research Institute of Agriculture and Life Sciences, Seoul National University, Seoul, Republic of Korea, **3** Bio-resources Bank Division, Nakdonggang National Institute of Biological Resources, Sangju, Republic of Korea, **4** Prokaryote Research Division, Biological Resources Research Department, Nakdonggang National Institute of Biological Resources, Sangju, Republic of Korea, **5** Cell Factory Research Center, Korea Research Institute of Bioscience and Biotechnology (KRIBB), Daejeon, Republic of Korea, **6** Fungi Research Division, Biological Resources Research Department, Nakdonggang National Institute of Biological Resources, Sangju, Republic of Korea, **7** Division of Cardiology, Emory University School of Medicine, Atlanta, Georgia, United States of America, **8** Department of Medical and Biological Sciences, The Catholic University of Korea, Bucheon, Republic of Korea

☞ These authors contributed equally to this work.

\* [woori@catholic.ac.kr](mailto:woori@catholic.ac.kr)

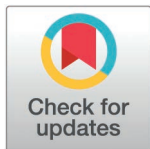

**OPEN ACCESS**

**Citation:** Kim J, Kim H, Goh J, Jin C-Z, Lee H-G, Lee CS, et al. (2026) Complete genome and functional insights into *Microbacterium* sp. strain FBCC-B4120, a novel freshwater isolate with diverse biotechnological traits. PLoS One 21(5): e0347549. <https://doi.org/10.1371/journal.pone.0347549>

**Editor:** Santhosh Sigamani, Duy Tan University, Dai Hoc Duy Tan, VIET NAM

**Received:** September 20, 2025

**Accepted:** April 3, 2026

**Published:** May 7, 2026

**Copyright:** © 2026 Kim et al. This is an open access article distributed under the terms of the [Creative Commons Attribution License](https://creativecommons.org/licenses/by/4.0/), which permits unrestricted use, distribution, and reproduction in any medium, provided the original author and source are credited.

**Data availability statement:** The complete genome sequence and raw sequencing reads of *Microbacterium* sp. FBCC-B4120 have been deposited in the NCBI database under BioProject accession number PRJNA1152748.

## Abstract

The genus *Microbacterium* encompasses a diverse group of Actinobacteria with broad ecological distribution and functional versatility. Here, we report the complete genome sequence of *Microbacterium* sp. FBCC-B4120, a novel strain isolated from a freshwater ecosystem in Korea. The genome was assembled into a single circular chromosome of 3.78 Mb with a G+C content of 70.5%, achieving 100% genome completeness. Phylogenomic analysis confirmed that FBCC-B4120 represents a distinct species within the genus, with *M. thalassium* identified as its closest relative. FBCC-B4120 demonstrated diverse physiological activities such as antimicrobial activity, siderophore production, glycosidase activity, and traits associated with anti-obesity and antiviral effects. Comparative genome analysis revealed a broad repertoire of carbohydrate-active enzymes and a distinct urea utilization cluster, suggesting expanded capacities for carbohydrate metabolism and nitrogen utilization. These findings establish FBCC-B4120 as a novel *Microbacterium* species with distinctive genomic features and multifunctional traits, highlighting its potential as a valuable resource for future biotechnological applications. However, the functional predictions presented here rely primarily on genomic annotation, and further biochemical validation will be required to confirm these activities.

**Funding:** This research was supported by the Korea Environment Industry & Technology Institute (KEITI) through the project to make multi-ministerial national biological research resources a more advanced program funded by the Korea Ministry of Environment (MOE) (grant number: 2021003420003). The funders had no role in study design, data collection and analysis, decision to publish, or preparation of the manuscript.

**Competing interests:** The authors have declared that no competing interests exist.

## Introduction

The genus *Microbacterium*, belonging to the phylum Actinobacteria, was first established by Orla-Jensen in 1919 [1]. This genus is Gram-positive, aerobic, non-motile rods that produce carotenoid pigments, typically resulting in a yellowish colony appearance [2]. To date, more than 160 validly published species have been described (<https://lpsn.dsmz.de/genus/microbacterium>), and the genus continues to expand through the discovery of novel species. *Microbacterium* species have been isolated from a variety of environments, including soils, marine habitats, plant rhizospheres, extreme environments, and even clinical specimens, underscoring their remarkable ecological adaptability [3–8].

The growing discovery of *Microbacterium* strains with diverse metabolic and ecological functions has highlighted their importance across industrial and environmental fields. Several strains have been studied as plant growth-promoting bacteria (PGPB), heavy metal bioremediators, and producers of industrial enzymes. For instance, *M. testaceum* exhibits notable plant growth-promoting traits such as indole-3-acetic acid production, siderophore synthesis, and biocontrol activity, making it a potential agricultural bioresource [9]. Other isolates from contaminated environments have demonstrated resistance and bioaccumulation capacity toward cadmium, cobalt, nickel, and chromium, suggesting possible applications in heavy metal bioremediation [10]. In the context of industrial biotechnology, the esterase EstSIT01 from *M. chocolatum* SIT101 has been identified as highly suitable for the synthesis of chiral intermediates in d-biotin production, demonstrating its utility as a biocatalyst [11]. Some *Microbacterium* strains have been reported to contribute to ecosystem processes, including organic matter cycling and pollutant degradation. *M. lacus*, isolated from lake sediments, was found to degrade the agricultural antibiotic sulfadiazine, suggesting its potential role in mitigating pharmaceutical contamination in aquatic systems [12]. In addition, *M. fluvii*, obtained from submerged wood in river ecosystems, has been shown to metabolize diverse carbon sources and produce extracellular enzymes, indicating its potential contribution to organic matter decomposition in freshwater environments [13].

In this study, we report the complete genome assembly of *Microbacterium* sp. FBCC-B4120, a novel strain from a freshwater ecosystem, and conduct comparative genome analysis with other *Microbacterium* species. In addition to genome-based phylogenetic characterization, we evaluated the physiological activities of FBCC-B4120, including antimicrobial activity,  $\beta$ -glucosidases activity, siderophore synthesis, and potential anti-obesity and antiviral properties. By integrating genomic and phenotypic findings, this study aims to elucidate the biological features and potential applications of FBCC-B4120, thereby expanding our understanding of the functional diversity within the genus *Microbacterium*.

## Materials and methods

### Strain information

Soil samples were collected from the brackish water zone of Suncheon Bay, Korea (34°53'4.21"N, 127°30'42.16"E), serially diluted, and cultured on R2A agar. Distinct

colonies were purified, and one isolate was designated *Microbacterium* sp. FBCC-B4120. Isolated strain is banked and maintained by the Freshwater Bioresources Culture Collection (FBCC), Nakdonggang National Institute of Biological Resources (NNIBR), Republic of Korea. The strain FBCC-B4120 was obtained from the FBCC-B4120 and used in this study.

### Ethics statement

This study did not involve any field sampling. The strain analyzed was obtained from the Freshwater Bioresources Culture Collection (FBCC), Nakdonggang National Institute of Biological Resources (NNIBR), Republic of Korea (catalog/accession: FBCC-B4120). The FBCC conducts original collection and curation in compliance with applicable regulations and institutional standard procedures (ISO 9001:2015). Therefore, no field access or collection permits were required for the work reported here.

### Assessment of functional activities

Representative plate images of the functional assays are provided in Fig S1 in [S1 File](#), and the corresponding quantitative measurements (n = 3) are summarized in Table S3 in [S1 File](#).

### Antibacterial activity assays

Antimicrobial activity was evaluated using a two-layer agar diffusion assay. The culture supernatant of strain FBCC-B4120 was filtered through a 0.22- $\mu$ m membrane and applied (150  $\mu$ L) to an 8-mm paper disc. Each disc was placed on R2A agar containing 5% of an *Escherichia coli* ATCC 25922 suspension ( $OD_{600}$  = 0.5). Plates were incubated at 30 °C for 48 h, and inhibition zones (mm) were measured. For comparison, R2A broth was used as a negative control. Inhibition zones for FBCC-B4120 and streptomycin controls were measured in triplicate.

### Siderophore production and phosphate solubilization

Siderophore production was assessed on Chrome Azurol S (CAS) agar (orange halo formation) [14], and phosphate solubilization on National Botanical Research Institute's Phosphate (NBRIP) agar (clear halo formation) [15].

### $\beta$ -glucosidase activity assays

$\beta$ -glucosidase activity was assessed using two complementary approaches. Esculin Iron Agar was employed, where dark halos around colonies indicated enzymatic activity and were measured in millimeters. Chromogenic polysaccharide substrates from the AZCL series (e.g., AZCL-amylose, Megazyme, Wicklow, Ireland) were used according to the manufacturer's instructions.

### Pancreatic lipase and $\alpha$ -glucosidase inhibition assays

Porcine pancreatic lipase, p-nitrophenyl butyrate (p-NPB), and Orlistat (all from Sigma-Aldrich) were used for the lipase inhibition assay. The reaction mixture was prepared by incubating the lipase solution with ethyl acetate extract of cell culture, followed by addition of p-NPB and subsequent incubation at 37 °C with shaking. Absorbance at 410nm was measured using a microplate reader (TECAN, Spark). The inhibitory activity was calculated using according to the following equation:

$$\text{Lipase inhibitions (\%)} = \left( 1 - \frac{A - A'}{B - B'} \right) \times 100$$

Where all parameters represent absorbance at 410 nm; A corresponds to the reaction mixture containing both the sample and p-NPB, A' to the sample blank (without p-NPB), B to the control containing p-NPB only, and B' to the control blank

(without p-NPB). Antiviral potential was evaluated by measuring  $\alpha$ -glucosidase inhibition using p-nitrophenyl- $\alpha$ -D-glucopyranoside as the substrate, as previously described [16].

### DNA extraction and genome sequencing

Genomic DNA of high quality was isolated with the Mag-Bind<sup>®</sup> Universal Pathogen Kit (Omega Bio-Tek, Norcross, GA, USA) following the supplier's instructions. DNA integrity and concentration were verified using both a NanoDrop 2000 spectrophotometer (Thermo Fisher Scientific, Waltham, MA, USA) and a Qubit 4 fluorometer equipped with the dsDNA High Sensitivity Assay Kit (Thermo Fisher Scientific, Waltham, MA, USA). For long-read sequencing, libraries were generated using the ligation sequencing kit (SQK-LSK114, Oxford Nanopore Technologies, Oxford, UK) and run on a Flongle R10.4 flow cell (FLO-FLG114, ONT). For short-read sequencing, libraries were prepared with the Illumina TruSeq Nano DNA kit and processed on the Illumina NovaSeq X platform (Illumina, San Diego, CA, USA).

### Genome assembly

Nanopore basecalling was conducted using Guppy v6.5.7 [17] with the super accuracy model. Trimming for adapter sequence in the generated reads was conducted using Porechop\_ABI v0.5.0 [18]. Trimmed reads were assembled using Flye v2.9.2 [19] with nano-hq parameter. For a more accurate genome sequence, hybrid assembly was conducted using long reads and short reads. Medaka v1.8.0 (<https://github.com/nanoporetech/medaka>, accessed in May 2023) was used for initial polishing with a super-accuracy calling model. The further polishing process was conducted using Pilon v.1.24 [20] for hybrid assembly. Short reads were mapped to the assembled genome using Bowtie2 v2.5.1 [21] with --no-mixed option (only proper pair read mapping) for more reliable read mapping, and the generated bam file was used as input for the Pilon polishing. Genome assembly completeness was evaluated using Benchmarking Universal Single-Copy Orthologs (BUSCO) v5.7.1 [22] with micrococcales\_odb10. A Tetra Correlation Search was conducted using JSpeciesWS [23].

### Comparative genome analysis

To analyze the evolutionary relationship of FBCC-B4120, comparative analyses were performed against 41 publicly available *Microbacterium* genomes: 40 complete genomes of other *Microbacterium* species and the contig-level assembly of *M. thalassium* obtained from NCBI Genome database (<https://www.ncbi.nlm.nih.gov/datasets/genome/>, accessed in May 2023). Prokka v1.14.6 [24] and Proksee (<https://proksee.ca/>) were used for gene annotation and construction of a circular genome map. The species delineation thresholds were analyzed using PYANI v0.2.13.1 [25] and the GGDC web server [26]. Average nucleotide identity (ANI) values were obtained using the BLAST method, while digital DNA-DNA hybridization (dDDH) values were calculated using formula 2. Pan-genome analysis was performed using Roary v3.13.0 [27] with the parameters -i 80 and -cd 100 to obtain aligned core gene sequences. For 16S rRNA genes, representative sequences from each genome were extracted and aligned using MAFFT v7.526 [28]. The aligned sequences of both core genes and 16S rRNA genes were trimmed with Gblocks v9.1 [29] to remove ambiguously aligned regions. Maximum likelihood phylogenetic trees were constructed using IQ-TREE 2 v2.4.0 [30] with the best-fit substitution model and ultrafast bootstrap approximation with 1,000 replicates. Clusters of Orthologous Genes (COG) functional annotation was performed using eggNOG-mapper v2.1.13 [31]. Carbohydrate-active enzymes were identified using the dbCAN v5.1.2 [32] against the Carbohydrate-Active enZymes database (CAZy) (<https://www.cazy.org/>). KEGG Orthology assignments and pathway reconstruction were carried out using KEGG Koala [33]. The functional association networks were constructed using STRING web server [34]. The complete proteome of FBCC-B4120, predicted from the annotated genome, was uploaded to STRING, and individual genes of interest were queried to generate interaction networks. Networks were constructed with default parameters and a medium confidence threshold (score  $\geq 0.4$ ) and visualized in Cytoscape v3.10.3 [35].

## Results and discussion

### Whole-genome features and phylogenomic placement of *Microbacterium* sp. FBCC-B4120

In this study, a complete and high-quality genome of *Microbacterium* sp. FBCC-B4120 was assembled using a hybrid approach combining Oxford Nanopore long-read and Illumina short-read sequencing data (Fig 1). Genome completeness, as evaluated by BUSCO analysis, was 100% (537 complete BUSCOs: 532 single-copy and 5 duplicated). The genome was assembled into a single circular chromosome without plasmids, totaling 3.78 Mb with a G + C content of 70.5%. Gene annotation identified 3,437 coding sequences, 6 rRNA genes, 54 tRNA genes, and 1 tmRNA (Table 1). Taxonomic affiliation was examined using Tetra Correlation Search (TCS) in JSpeciesWS, which confirmed assignment to the genus *Microbacterium* and revealed the highest similarity (Z-score > 0.997) with *M. thalassium*.

To further resolve the phylogenetic position of FBCC-B4120, we compared it with 40 publicly available complete genomes from the genus and the reference genome of *M. thalassium* (S1 Table in S1 File). ANI and dDDH values, which are standard criteria for prokaryotic species delineation (ANI ≥ 95–96% and dDDH ≥ 70%) [36], showed that FBCC-B4120 shared ANI of 85.6% (alignment coverage 67.3%) and dDDH of 30.1% with *M. thalassium* (S2 Table in S1 File). These values are well below the accepted thresholds, indicating that FBCC-B4120 represents a phylogenetically related but

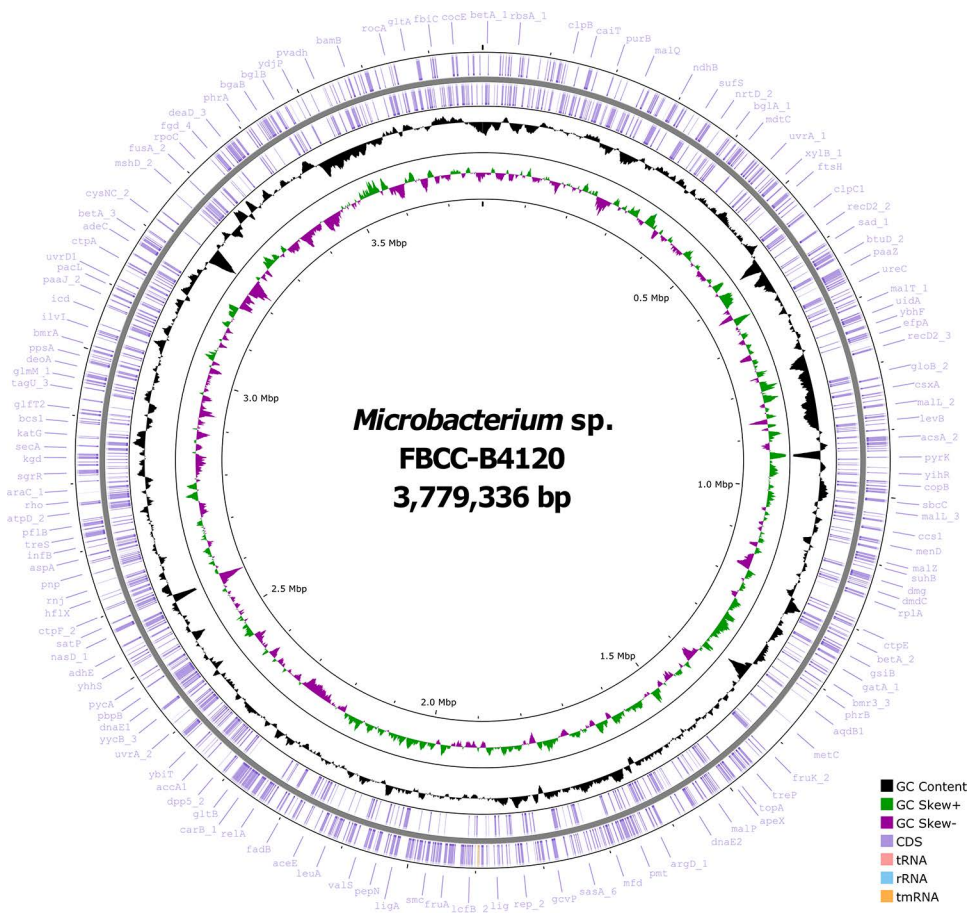

**Fig 1. Circular genome map of *Microbacterium* sp. FBCC-B4120.** The complete genome consists of a single circular chromosome (3,779,336 bp) with a G + C content of 70.5%. From the outer to the inner circle: predicted coding sequences (CDSs), tRNA, rRNA, and tmRNA genes are indicated, followed by GC content and GC skew. Representative functional genes are labeled on the outer track.

<https://doi.org/10.1371/journal.pone.0347549.g001>

**Table 1. Whole genome sequence overview of FBCC-B4120.**

| Species Name               | <i>Microbacterium</i> sp. FBCC-B4120                                                           |
|----------------------------|------------------------------------------------------------------------------------------------|
| NCBI Taxonomy ID           | 33882                                                                                          |
| Domain                     | Bacteria                                                                                       |
| Taxonomy                   | Bacteria; Terrabacteria group; Actinomycetota; Actinomycetes; Micrococcales; Microbacteriaceae |
| Genome Size (bp)           | 3,779,336                                                                                      |
| GC content in the DNA      | 70.5 mol% G + C                                                                                |
| Number of Genome Sequences | 1 Circular (Single chromosomal DNA without plasmid)                                            |
| Number of Plasmids         | 0                                                                                              |
| Number of Coding Sequences | 3,437                                                                                          |
| Number of rRNAs            | 6                                                                                              |
| Number of tRNAs (tmRNA)    | 54 (1)                                                                                         |

<https://doi.org/10.1371/journal.pone.0347549.t001>

distinct species within the genus *Microbacterium*. Phylogenomic trees were reconstructed using both the 16S rRNA gene sequence and the core gene set derived from pan-genome analysis. In the 16S rRNA gene-based tree, FBCC-B4120 clustered with *M. thalassium* with strong bootstrap support (98%), forming a sister lineage characterized by a short branch length (Fig 2A). Together with *M. binotii*, they formed a clade adjacent to the *M. azadirachtae*–*M. resistens* group. Consistently, the core gene-based tree also placed FBCC-B4120 as a sister lineage to *M. thalassium*, with 100% bootstrap support (Fig 2B). In contrast to the 16S rRNA tree, however, the branch length separating FBCC-B4120 and *M. thalassium* was relatively longer, highlighting clearer genome-wide divergence.

These results indicate that FBCC-B4120 represents a novel species within the genus *Microbacterium*, consistently forming a sister lineage to *M. thalassium*. Interestingly, both species were isolated from saline-associated environments, with FBCC-B4120 obtained from brackish soil and *M. thalassium* from the mangrove rhizosphere [37]. While this ecological correspondence suggests that adaptation to elevated salinity, further genomic and functional evidence would be required to substantiate this link.

### Functional and physiological characterization of FBCC-B4120

To evaluate the industrial potential of FBCC-B4120, we assessed its antimicrobial activity, plant growth-promoting traits, extracellular enzyme production, and physiological enzyme activities (S1 Figure and S3 Table in S1 File).

FBCC-B4120 formed a clear inhibition zone of  $24.77 \pm 0.54$  mm ( $n = 3$ ) against *Escherichia coli* ATCC 25922, indicating antibacterial activity.

Siderophore production was confirmed by the CAS assay, which formed an orange halo of  $5.17 \pm 0.29$  mm. Siderophores are high-affinity iron-chelating metabolites secreted under iron-limiting conditions and known to play important roles in rhizosphere colonization and microbial competition [38]. By contrast, phosphate solubilization was not detected, suggesting that FBCC-B4120 contributes to iron acquisition but lacks phosphate-solubilizing capacity.

$\beta$ -glucosidase activity assays on Esculin Iron Agar revealed a dark zone of  $21.33 \pm 1.15$  mm, indicating strong enzymatic activity.  $\beta$ -glucosidase, a subclass of glycosidases, specifically cleave  $\beta$ -glycosidic bonds in carbohydrates, releasing glucose from diverse  $\beta$ -glucosides including disaccharides, oligosaccharides, and plant-derived glycosides [39,40]. These enzymes play essential roles in cellulose and biomass degradation, carbon cycling, and microbial nutrient acquisition, and they are of considerable industrial importance for biofuel production, food processing, and the synthesis or modification of pharmaceutical glycosides [41–44].

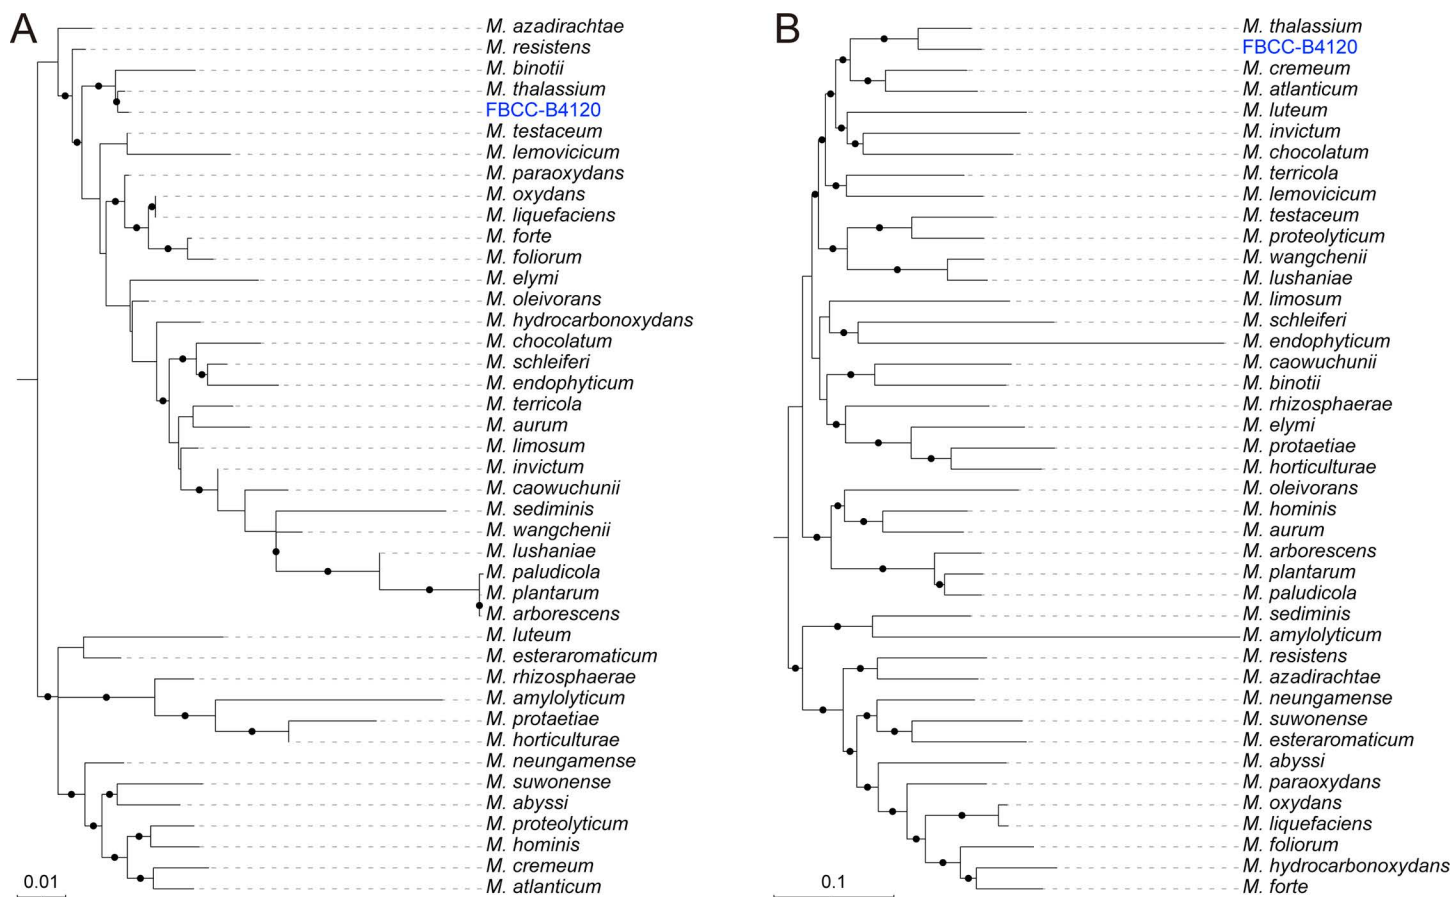

**Fig 2. Phylogenomic analysis of *Microbacterium* sp. FBCC-B4120.** FBCC-B4120 is highlighted in blue. Both phylogenies consistently place FBCC-B4120 as a sister lineage to *M. thalassium*, with strong bootstrap support. (A) Maximum-likelihood tree based on the 16S rRNA gene sequence. (B) Maximum-likelihood tree based on the core gene set from pan-genome analysis.

<https://doi.org/10.1371/journal.pone.0347549.g002>

Physiological enzyme assays further revealed a pancreatic lipase inhibition rate of  $24.38 \pm 0.68\%$  and an  $\alpha$ -glucosidase inhibition rate of  $41.22 \pm 16.79\%$ . Pancreatic lipase is a key enzyme in triglyceride hydrolysis and a major therapeutic target for anti-obesity drug development [45,46], whereas  $\alpha$ -glucosidase is implicated in glycoprotein processing in host and viral systems [47,48]. These inhibitory effects suggest potential relevance of FBCC-B4120 to anti-obesity and antiviral mechanisms, although further validation is required.

Collectively, FBCC-B4120 exhibits multiple functional traits, including *E. coli*-specific antimicrobial activity, siderophore production, strong  $\beta$ -glucosidase activity, and bioactive enzyme inhibition. These findings demonstrate its potential industrial relevance. However, the precise metabolites and genetic determinants underlying these activities remain to be clarified. Further genome-guided analyses of metabolic pathways and biosynthetic gene clusters will be required to elucidate the mechanisms and to evaluate the application potential of this strain.

### Comparative genomics insights into the functional repertoire of FBCC-B4120

To further characterize the functional genomic landscape of FBCC-B4120, comparative pan-genome and functional annotation analyses were conducted using 41 publicly available *Microbacterium* genomes. The pan-genome comprised 76,156

genes, including 195 core genes shared by all strains and 75,961 accessory genes. FBCC-B4120 contributed 1,052 unique genes.

Across the genus, the dominant COG categories were E (amino acid transport & metabolism), G (carbohydrate transport & metabolism), and K (transcription), which reflect core metabolic and regulatory functions. FBCC-B4120 displayed a relatively higher proportion of category C (energy production & conversion), encompassing genes associated with electron transport chains, ATP synthesis, and respiratory metabolism (Fig 3A). This enrichment suggests enhanced energetic adaptability. Carbohydrate-active enzyme annotations showed that glycoside hydrolases (GHs) and glycosyltransferases (GTs) are the dominant enzyme classes across the genus *Microbacterium*, and FBCC-B4120 exhibited relatively elevated proportions of both families (Fig 3B). GHs are primarily involved in the degradation and conversion of carbohydrates, consistent with the strong  $\beta$ -glucosidase activity observed in this strain. In contrast, GTs are associated with polysaccharide biosynthesis, cell wall formation, and host interactions [49,50]. In FBCC-B4120, 27 GH families were identified. The most abundant were GH13 (15 genes), GH3 (7 genes), GH1 (4 genes), GH32 (4 genes), and GH109 (5 genes) (Fig 3C). Additional families reflect a broad enzymatic repertoire. Among the identified GH families, GH1 and GH3 included several genes annotated as  $\beta$ -glucosidases (Table 2). These  $\beta$ -glucosidase genes are likely to underlie the strong activity observed on Esculin Iron Agar, suggesting that FBCC-B4120 harbors multiple isoenzymes contributing to its robust carbohydrate-degrading capacity.

KEGG functional profiling was conducted to assess the metabolic and functional characteristics of FBCC-B4120 (Fig 4A). The majority of genes were assigned to core metabolic pathways such as Carbohydrate metabolism (217 genes), Genetic information processing (160 genes), Environmental information processing (154 genes), and Amino acid

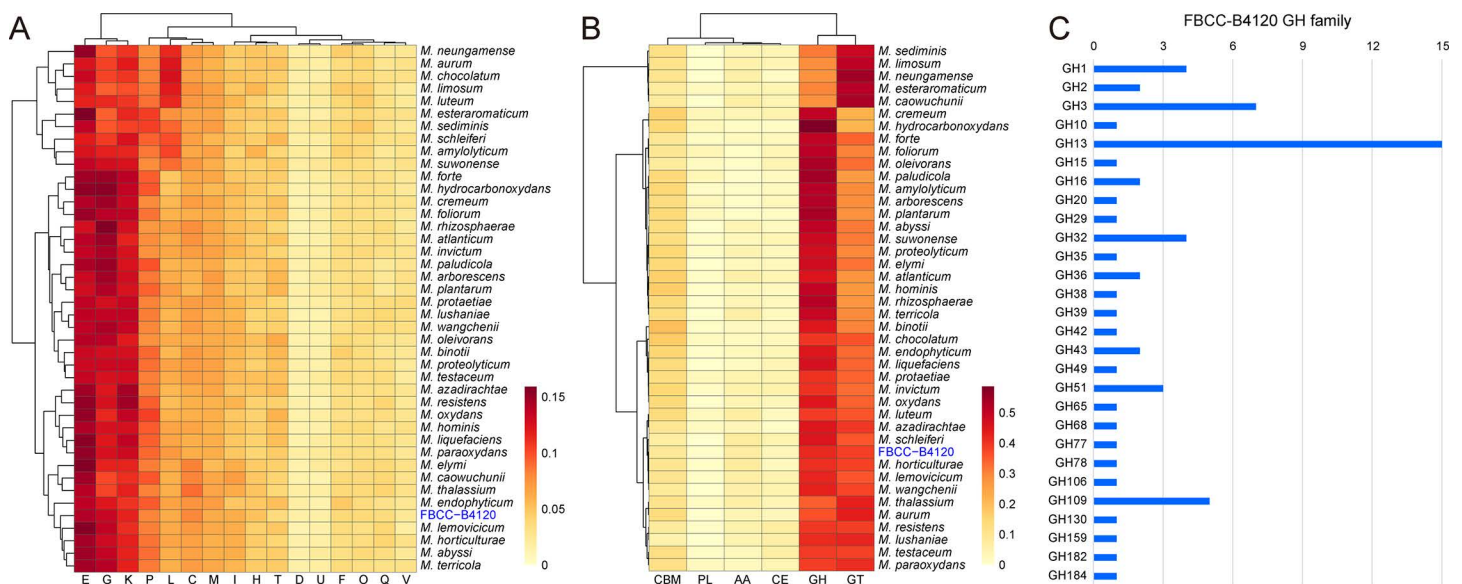

**Fig 3. Functional genome profiling of *Microbacterium* sp. FBCC-B4120 in the context of the genus.** (A) Heatmap of row-normalized proportions for selected COG functional categories across 41 *Microbacterium* genomes. Categories shown: E, amino acid transport & metabolism; G, carbohydrate transport & metabolism; K, transcription; P, inorganic ion transport & metabolism; L, replication, recombination & repair; C, energy production & conversion; M, cell wall/membrane/envelope biogenesis; I, lipid transport & metabolism; H, coenzyme transport & metabolism; T, signal transduction mechanisms; D, cell cycle control, division & chromosome partitioning; U, intracellular trafficking, secretion & vesicular transport; F, nucleotide transport & metabolism; O, posttranslational modification, protein turnover & chaperones; Q, secondary metabolite biosynthesis, transport & catabolism; V, defense mechanisms. Higher color intensity indicates a greater within-genome proportion for that category. (B) Heatmap of row-normalized proportions of CAZY top-level classes (GH, GT, PL, CE, CBM, and AA) across *Microbacterium* genomes. (C) Distribution of glycoside hydrolase (GH) families in strain FBCC-B4120, highlighting the most abundant GH families.

<https://doi.org/10.1371/journal.pone.0347549.g003>

**Table 2.  $\beta$ -glucosidase genes of FBCC-B4120 belonging to GH1 and GH3 families.**

| Gene ID        | KO     | EC       | Preferred name | Description                                  | CAZy | dbCAN    |
|----------------|--------|----------|----------------|----------------------------------------------|------|----------|
| OENLEIBI_00015 | K05349 | 3.2.1.21 | <i>bglX</i>    | Glycosyl hydrolase family 3 (GH3)            | GH3  | GH3_e128 |
| OENLEIBI_00602 | K05349 | 3.2.1.21 | –              | GH3 family, $\beta$ -glucosidase             | GH3  | GH3_e94  |
| OENLEIBI_03195 | K05349 | 3.2.1.21 | –              | GH3 family, fibronectin type III-like domain | GH3  | GH3_e197 |
| OENLEIBI_03350 | K05349 | 3.2.1.21 | <i>bglK</i>    | GH3 family, fibronectin type III-like domain | GH3  | GH3_e154 |
| OENLEIBI_00386 | K05350 | 3.2.1.21 | –              | Glycosyl hydrolase family 1 (GH1)            | –    | GH1_e113 |
| OENLEIBI_00769 | K05350 | 3.2.1.21 | –              | Glycosyl hydrolase family 1 (GH1)            | –    | GH1_e69  |
| OENLEIBI_02481 | K05350 | 3.2.1.21 | –              | Glycosyl hydrolase family 1 (GH1)            | –    | GH1_e113 |

<https://doi.org/10.1371/journal.pone.0347549.t002>

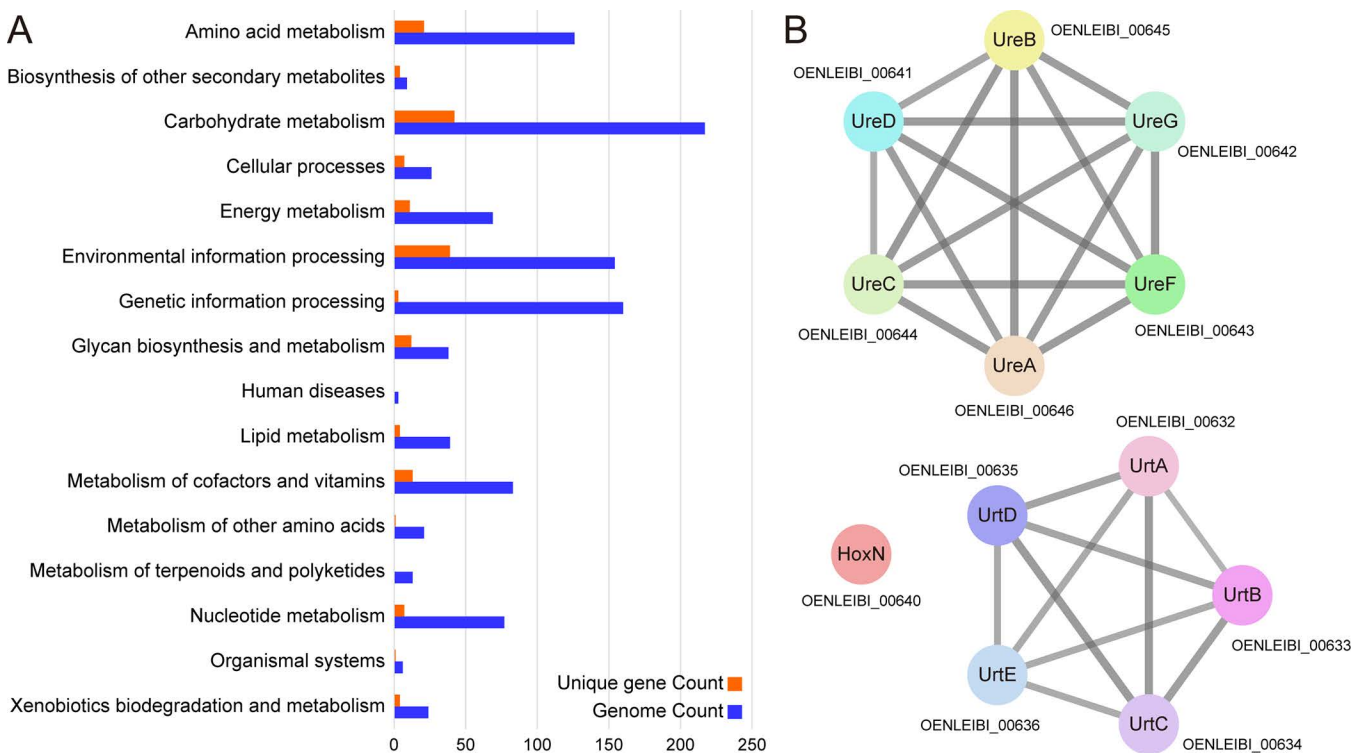

**Fig 4. KEGG functional profiling and urea utilization cluster of *Microbacterium* sp. FBCC-B4120.** (A) KEGG functional categorization of genome-wide annotated genes and unique genes in FBCC-B4120, illustrating the distribution of metabolic and cellular pathways. (B) STRING-based network representation of the urea utilization cluster, comprising urea transport components (UrtABCDE), nickel transporter (HoxN), and urease structural and accessory proteins (UreABCDEFG). The network was reconstructed using a high-confidence cutoff of 0.7, with active sources from Experiments, Databases, Neighborhood, and Gene Fusion.

<https://doi.org/10.1371/journal.pone.0347549.g004>

metabolism (126 genes). Among the unique genes, Carbohydrate metabolism (42 genes) and Environmental information processing (39 genes) were most prominent, suggesting potential specialization of the strain in the utilization of diverse carbohydrate resources and adaptation to environmental changes. In addition, a considerable number of unique genes were identified in Amino acid metabolism (21 genes), Metabolism of cofactors and vitamins (13 genes), and Glycan biosynthesis and metabolism (12 genes), suggesting that FBCC-B4120 may harbor genomic traits contributing to nitrogen utilization, cofactor biosynthesis, and glycan metabolism. Interestingly, among the ABC transporter-related unique genes,

FBCC-B4120 harbors a complete urea transport system. This observation indicates that a fully assembled Urt operon is present, which allows this strain to utilize urea as a nitrogen source [51].

Gene annotation analysis further identified a gene cluster that allows sequential urea uptake and hydrolysis. A complete set of ABC-type urea transporters (UrtABCDE) was identified. Although Prokka annotated some components as branched-chain amino acid ABC transporters, both eggNOG and KEGG Koala consistently mapped them to the Urt operon, with domain structure (Peripla\_BP/ABC\_tran/BPD\_transp) further supporting this classification (S4 Table in S1 File). Upstream of the operon, TetR family transcriptional regulators were detected, suggesting possible transcriptional regulation of the cluster [52]. Downstream of the Urt operon, modules for urease activation and nickel acquisition were consecutively organized. A high-affinity nickel transporter (HoxN) was present, supplying Ni<sup>2+</sup> required for urease activation [53], followed by accessory proteins UreD, UreF, and UreG, and the catalytic subunits UreA, UreB, and UreC [54]. Although a canonical UreE homolog was not detected within the cluster, previous studies in actinobacteria have suggested that UreG/CobW-like proteins may function as alternative metal chaperones [55], which could also be the case here. Taken together, this urea utilization cluster provides a coherent pathway consisting of urea transport (UrtABCDE), nickel uptake (HoxN), and urease assembly and catalysis (UreABCDFG) (Fig 4B). These features suggest that FBCC-B4120 is capable of utilizing urea as a nitrogen source, with urease activity generating ammonia and thereby increasing local pH, which may confer ecological advantages [56,57].

Overall, the comparative genomic analyses indicate that FBCC-B4120 harbors an enriched repertoire of carbohydrate-active enzymes together with a strain-specific urea utilization cluster, providing genomic insights into its multifunctional traits and underscoring its ecological versatility and potential for biotechnological applications. Nevertheless, these insights are derived from *in silico* annotations and comparative analyses; thus, functional validation through targeted biochemical and physiological assays will be necessary to substantiate the predicted roles of these gene clusters.

## Conclusion

In this study, we presented the complete genome sequence of *Microbacterium* sp. FBCC-B4120, a novel freshwater isolate that represents a distinct species within the genus. The high-quality circular genome of FBCC-B4120 (3.78 Mb, 70.5% G + C) showed 100% completeness. Comparative genome metrics further revealed that FBCC-B4120 possesses a genome size and GC content similar to *M. thalassium* but shares only 85.6% ANI and 30.1% dDDH, confirming its species-level divergence.

Phenotypic characterization showed that FBCC-B4120 possesses multiple functional traits, including antimicrobial activity against *E. coli*, siderophore production, glycosidase activity, and additional physiological properties associated with anti-obesity and antiviral effects. Genome-based analyses further complemented these findings by revealing metabolic features that may support ecological adaptation and potential utility. In particular, the presence of a complete urea utilization cluster suggests a coordinated system for urea transport, nickel acquisition, and urease-mediated hydrolysis, which may contribute to nitrogen utilization and persistence in freshwater environments.

Overall, these findings expand current knowledge of the genus *Microbacterium* by introducing novel species with distinct experimental and genomic features. Nevertheless, this study has limitations, as the bioactive compounds underlying the observed physiological activities were not chemically identified, and most functional predictions relied on genomic annotation. Further biochemical and ecological investigations will be essential to clarify the molecular mechanisms and confirm the functional capacities of this strain.

## Supporting information

**S1 File. S1 Table.** List of *Microbacterium* species genomes used for comparative and phylogenomic analyses. **S2 Table.** Pairwise ANI and dDDH values between *Microbacterium* sp. FBCC-B4120 and reference *Microbacterium* genomes. **S3 Table.** Results of repeated measurements for each activity experiment of *Microbacterium* sp. FBCC-B4120. **S4 Table.** Predicted genes comprising the urea utilization cluster in *Microbacterium* sp. FBCC-B4120. **S1 Fig.** Functional assays

of *Microbacterium* sp. FBCC-B4120. (A) R2A broth negative control and streptomycin positive controls for the antimicrobial activity assay against *Escherichia coli* ATCC 25922: (-), R2A broth; 100, streptomycin 100 ppm; 1000, streptomycin 1,000 ppm. (B) Antimicrobial activity against *E. coli* ATCC 25922. (C) Siderophore production on CAS agar. (D)  $\beta$ -glucosidase activity on Esculin Iron Agar. (ZIP)

## Author contributions

**Data curation:** Jaeduk Goh, Chun-Zhi Jin, Eu Jin Chung, Yejin Park.

**Formal analysis:** Jina Kim, Hyaekang Kim.

**Funding acquisition:** Woori Kwak.

**Investigation:** Jina Kim, Hyaekang Kim, Chun-Zhi Jin, Hyung-Gwan Lee.

**Project administration:** Hyaekang Kim, Woori Kwak.

**Resources:** Hyaekang Kim, Chang Soo Lee, Sanghwa Park, Eu Jin Chung, Yejin Park, Seungmin Shin.

**Supervision:** Woori Kwak.

**Validation:** Jina Kim, Hyaekang Kim, Chun-Zhi Jin, Hyung-Gwan Lee.

**Visualization:** Jina Kim.

**Writing – original draft:** Jina Kim, Hyaekang Kim.

**Writing – review & editing:** Youngmin Han, Woori Kwak.

## References

1. Orla-Jensen S. The lactic acid bacteria. AF Host. 1919.
2. Takeuchi M, Hatano K. Union of the genera *Microbacterium* Orla-Jensen and *Aureobacterium* Collins *et al.* in a redefined genus *Microbacterium*. *Int J Syst Bacteriol.* 1998;48 Pt 3:739–47. <https://doi.org/10.1099/00207713-48-3-739> PMID: 9734028
3. Zhang L, Xi L, Ruan J, Huang Y. *Microbacterium marinum* sp. nov., isolated from deep-sea water. *Syst Appl Microbiol.* 2012;35(2):81–5. <https://doi.org/10.1016/j.syapm.2011.11.004> PMID: 22280899
4. Madhaiyan M, Poonguzhali S, Lee J-S, Lee K-C, Saravanan VS, Santhanakrishnan P. *Microbacterium azadirachtae* sp. nov., a plant-growth-promoting actinobacterium isolated from the rhizosphere of neem seedlings. *Int J Syst Evol Microbiol.* 2010;60(Pt 7):1687–92. <https://doi.org/10.1099/ijs.0.015800-0> PMID: 19734284
5. Mandakovic D, Cintolesi Á, Maldonado J, Mendoza SN, Aite M, Gaete A, et al. Genome-scale metabolic models of *Microbacterium* species isolated from a high altitude desert environment. *Sci Rep.* 2020;10(1):5560. <https://doi.org/10.1038/s41598-020-62130-8> PMID: 32221328
6. Gneiding K, Frodl R, Funke G. Identities of *Microbacterium* spp. encountered in human clinical specimens. *J Clin Microbiol.* 2008;46(11):3646–52. <https://doi.org/10.1128/JCM.01202-08> PMID: 18799696
7. Sheng XF, He LY, Zhou L, Shen YY. Characterization of *Microbacterium* sp. F10a and its role in polycyclic aromatic hydrocarbon removal in low-temperature soil. *Can J Microbiol.* 2009;55(5):529–35. <https://doi.org/10.1139/w09-005> PMID: 19483781
8. Liu C, Zhuang J, Wang J, Fan G, Feng M, Zhang S. Soil bacterial communities of three types of plants from ecological restoration areas and plant-growth promotional benefits of *Microbacterium invictum* (strain X-18). *Front Microbiol.* 2022;13:926037. <https://doi.org/10.3389/fmicb.2022.926037> PMID: 35992669
9. Patel A, Sahu KP, Mehta S, Balamurugan A, Kumar M, Sheoran N, et al. Rice leaf endophytic *Microbacterium testaceum*: Antifungal actinobacterium confers immunocompetence against rice blast disease. *Front Microbiol.* 2022;13:1035602. <https://doi.org/10.3389/fmicb.2022.1035602> PMID: 36619990
10. Learman DR, Ahmad Z, Brookshier A, Henson MW, Hewitt V, Lis A, et al. Comparative genomics of 16 *Microbacterium* spp. that tolerate multiple heavy metals and antibiotics. *PeerJ.* 2019;6:e6258. <https://doi.org/10.7717/peerj.6258> PMID: 30671291
11. Li X, Yu H, Liu S, Ma B, Wu X, Zheng X, et al. Discovery, characterization and mechanism of a *Microbacterium* esterase for key d-biotin chiral intermediate synthesis. *Bioresour Bioprocess.* 2024;11(1):59. <https://doi.org/10.1186/s40643-024-00776-2> PMID: 38879848
12. Tappe W, Herbst M, Hofmann D, Koepfchen S, Kummer S, Thiele B, et al. Degradation of sulfadiazine by *Microbacterium lacus* strain SDZm4, isolated from lysimeters previously manured with slurry from sulfadiazine-medicated pigs. *Appl Environ Microbiol.* 2013;79(8):2572–7. <https://doi.org/10.1128/AEM.03636-12> PMID: 23396336

13. Kageyama A, et al. *Microbacterium awajense* sp. nov., *Microbacterium fluvii* sp. nov. and *Microbacterium pygmaeum* sp. nov. *Actinomycetologica*. 2008;22(1):1–5.
14. Schwyn B, Neilands JB. Universal chemical assay for the detection and determination of siderophores. *Anal Biochem*. 1987;160(1):47–56. [https://doi.org/10.1016/0003-2697\(87\)90612-9](https://doi.org/10.1016/0003-2697(87)90612-9) PMID: 2952030
15. Nautiyal CS. An efficient microbiological growth medium for screening phosphate solubilizing microorganisms. *FEMS Microbiol Lett*. 1999;170(1):265–70. <https://doi.org/10.1111/j.1574-6968.1999.tb13383.x> PMID: 9919677
16. Mehta A, Zitzmann N, Rudd PM, Block TM, Dwek RA. Alpha-glucosidase inhibitors as potential broad based anti-viral agents. *FEBS Lett*. 1998;430(1–2):17–22. [https://doi.org/10.1016/s0014-5793\(98\)00525-0](https://doi.org/10.1016/s0014-5793(98)00525-0) PMID: 9678587
17. Wick RR, Judd LM, Holt KE. Performance of neural network basecalling tools for Oxford Nanopore sequencing. *Genome Biol*. 2019;20(1):129. <https://doi.org/10.1186/s13059-019-1727-y> PMID: 31234903
18. Bonenfant Q, Noé L, Touzet H. Porechop\_ABI: discovering unknown adapters in Oxford Nanopore Technology sequencing reads for downstream trimming. *Bioinform Adv*. 2022;3(1):vbac085. <https://doi.org/10.1093/bioadv/vbac085> PMID: 36698762
19. Kolmogorov M, Yuan J, Lin Y, Pevzner PA. Assembly of long, error-prone reads using repeat graphs. *Nat Biotechnol*. 2019;37(5):540–6. <https://doi.org/10.1038/s41587-019-0072-8> PMID: 30936562
20. Walker BJ, Abeel T, Shea T, Priest M, Abouelliel A, Sakthikumar S, et al. Pilon: an integrated tool for comprehensive microbial variant detection and genome assembly improvement. *PLoS One*. 2014;9(11):e112963. <https://doi.org/10.1371/journal.pone.0112963> PMID: 25409509
21. Langmead B, Salzberg SL. Fast gapped-read alignment with Bowtie 2. *Nat Methods*. 2012;9(4):357–9. <https://doi.org/10.1038/nmeth.1923> PMID: 22388286
22. Manni M, Berkeley MR, Seppey M, Simão FA, Zdobnov EM. BUSCO Update: Novel and Streamlined Workflows along with Broader and Deeper Phylogenetic Coverage for Scoring of Eukaryotic, Prokaryotic, and Viral Genomes. *Mol Biol Evol*. 2021;38(10):4647–54. <https://doi.org/10.1093/molbev/msab199> PMID: 34320186
23. Richter M, Rosselló-Móra R, Oliver Glöckner F, Peplies J. JSpeciesWS: a web server for prokaryotic species circumscription based on pairwise genome comparison. *Bioinformatics*. 2016;32(6):929–31. <https://doi.org/10.1093/bioinformatics/btv681> PMID: 26576653
24. Seemann T. Prokka: rapid prokaryotic genome annotation. *Bioinformatics*. 2014;30(14):2068–9. <https://doi.org/10.1093/bioinformatics/btu153> PMID: 24642063
25. Pritchard L, Glover RH, Humphris S, Elphinstone JG, Toth IK. Genomics and taxonomy in diagnostics for food security: soft-rotting enterobacterial plant pathogens. *Anal Methods*. 2016;8(1):12–24. <https://doi.org/10.1039/c5ay02550h>
26. Meier-Kolthoff JP. TYGS and LPSN: a database tandem for fast and reliable genome-based classification and nomenclature of prokaryotes. *Nucleic acids research*, 2022. 50(D1): p. D801–D807.
27. Page AJ, Cummins CA, Hunt M, Wong VK, Reuter S, Holden MTG, et al. Roary: rapid large-scale prokaryote pan genome analysis. *Bioinformatics*. 2015;31(22):3691–3. <https://doi.org/10.1093/bioinformatics/btv421> PMID: 26198102
28. Katoh K, Standley DM. MAFFT multiple sequence alignment software version 7: improvements in performance and usability. *Mol Biol Evol*. 2013;30(4):772–80. <https://doi.org/10.1093/molbev/mst010> PMID: 23329690
29. Castresana J. Selection of conserved blocks from multiple alignments for their use in phylogenetic analysis. *Mol Biol Evol*. 2000;17(4):540–52. <https://doi.org/10.1093/oxfordjournals.molbev.a026334> PMID: 10742046
30. Minh BQ, Schmidt HA, Chernomor O, Schrempf D, Woodhams MD, von Haeseler A, et al. IQ-TREE 2: New Models and Efficient Methods for Phylogenetic Inference in the Genomic Era. *Mol Biol Evol*. 2020;37(5):1530–4. <https://doi.org/10.1093/molbev/msaa015> PMID: 32011700
31. Cantalapiedra CP, Hernández-Plaza A, Letunic I, Bork P, Huerta-Cepas J. eggNOG-mapper v2: Functional Annotation, Orthology Assignments, and Domain Prediction at the Metagenomic Scale. *Mol Biol Evol*. 2021;38(12):5825–9. <https://doi.org/10.1093/molbev/msab293> PMID: 34597405
32. Zheng J, Ge Q, Yan Y, Zhang X, Huang L, Yin Y. dbCAN3: automated carbohydrate-active enzyme and substrate annotation. *Nucleic Acids Res*. 2023;51(W1):W115–21. <https://doi.org/10.1093/nar/gkad328> PMID: 37125649
33. Kanehisa M, Sato Y, Morishima K. BlastKOALA and GhostKOALA: KEGG tools for functional characterization of genome and metagenome sequences. *Journal of Molecular Biology*. 2016;428(4):726–31.
34. Szklarczyk D, Kirsch R, Koutrouli M, Nastou K, Mehryary F, Hachilif R, et al. The STRING database in 2023: protein-protein association networks and functional enrichment analyses for any sequenced genome of interest. *Nucleic Acids Res*. 2023;51(D1):D638–46. <https://doi.org/10.1093/nar/gkac1000> PMID: 36370105
35. Shannon P, Markiel A, Ozier O, Baliga NS, Wang JT, Ramage D, et al. Cytoscape: a software environment for integrated models of biomolecular interaction networks. *Genome Res*. 2003;13(11):2498–504. <https://doi.org/10.1101/gr.1239303> PMID: 14597658
36. Richter M, Rosselló-Móra R. Shifting the genomic gold standard for the prokaryotic species definition. *Proc Natl Acad Sci U S A*. 2009;106(45):19126–31. <https://doi.org/10.1073/pnas.0906412106> PMID: 19855009
37. Takeuchi M, Hatano K. Proposal of six new species in the genus *Microbacterium* and transfer of *Flavobacterium marinotipicum* ZoBell and Upham to the genus *Microbacterium* as *Microbacterium maritipicum* comb. nov. *Int J Syst Bacteriol*. 1998;48 Pt 3:973–82. <https://doi.org/10.1099/00207713-48-3-973> PMID: 9734054

38. Gu S, Wei Z, Shao Z, Friman V-P, Cao K, Yang T, et al. Competition for iron drives phytopathogen control by natural rhizosphere microbiomes. *Nat Microbiol*. 2020;5(8):1002–10. <https://doi.org/10.1038/s41564-020-0719-8> PMID: [32393858](https://pubmed.ncbi.nlm.nih.gov/32393858/)
39. Cairns JRK, Esen A.  $\beta$ -Glucosidases. *Cellular and molecular life sciences: CMLS*. 2010;67(20):3389.
40. Konar S, Sinha SK, Datta S, Ghorai PK. Probing the Effect of Glucose on the Activity and Stability of  $\beta$ -Glucosidase: An All-Atom Molecular Dynamics Simulation Investigation. *ACS Omega*. 2019;4(6):11189–96. <https://doi.org/10.1021/acsomega.9b00509> PMID: [31460219](https://pubmed.ncbi.nlm.nih.gov/31460219/)
41. Datta R. Enzymatic degradation of cellulose in soil: A review. *Heliyon*. 2024;10(1):e24022. <https://doi.org/10.1016/j.heliyon.2024.e24022> PMID: [38234915](https://pubmed.ncbi.nlm.nih.gov/38234915/)
42. Zang X, Liu M, Fan Y, Xu J, Xu X, Li H. The structural and functional contributions of  $\beta$ -glucosidase-producing microbial communities to cellulose degradation in composting. *Biotechnol Biofuels*. 2018;11:51. <https://doi.org/10.1186/s13068-018-1045-8> PMID: [29492106](https://pubmed.ncbi.nlm.nih.gov/29492106/)
43. Singh G, Verma AK, Kumar V. Catalytic properties, functional attributes and industrial applications of  $\beta$ -glucosidases. *3 Biotech*. 2016;6(1):3. <https://doi.org/10.1007/s13205-015-0328-z> PMID: [28330074](https://pubmed.ncbi.nlm.nih.gov/28330074/)
44. Kannan P, Shafreen M M, Achudhan AB, Gupta A, Saleena LM. A review on applications of  $\beta$ -glucosidase in food, brewery, pharmaceutical and cosmetic industries. *Carbohydr Res*. 2023;530:108855. <https://doi.org/10.1016/j.carres.2023.108855> PMID: [37263146](https://pubmed.ncbi.nlm.nih.gov/37263146/)
45. Birari RB, Bhutani KK. Pancreatic lipase inhibitors from natural sources: unexplored potential. *Drug Discov Today*. 2007;12(19–20):879–89. <https://doi.org/10.1016/j.drudis.2007.07.024> PMID: [17933690](https://pubmed.ncbi.nlm.nih.gov/17933690/)
46. Liu T-T, Liu X-T, Chen Q-X, Shi Y. Lipase Inhibitors for Obesity: A Review. *Biomed Pharmacother*. 2020;128:110314. <https://doi.org/10.1016/j.biopha.2020.110314> PMID: [32485574](https://pubmed.ncbi.nlm.nih.gov/32485574/)
47. Chang J, Block TM, Guo J-T. Antiviral therapies targeting host ER  $\alpha$ -glucosidases: current status and future directions. *Antiviral Res*. 2013;99(3):251–60. <https://doi.org/10.1016/j.antiviral.2013.06.011> PMID: [23816430](https://pubmed.ncbi.nlm.nih.gov/23816430/)
48. Williams SJ, Goddard-Borger ED.  $\alpha$ -glucosidase inhibitors as host-directed antiviral agents with potential for the treatment of COVID-19. *Biochem Soc Trans*. 2020;48(3):1287–95. <https://doi.org/10.1042/BST20200505> PMID: [32510142](https://pubmed.ncbi.nlm.nih.gov/32510142/)
49. Zabolina OA, Zhang N, Weerts R. Polysaccharide Biosynthesis: Glycosyltransferases and Their Complexes. *Front Plant Sci*. 2021;12:625307. <https://doi.org/10.3389/fpls.2021.625307> PMID: [33679837](https://pubmed.ncbi.nlm.nih.gov/33679837/)
50. Yakovlieva L, Walvoort MTC. Processivity in Bacterial Glycosyltransferases. *ACS Chem Biol*. 2020;15(1):3–16. <https://doi.org/10.1021/acscchembio.9b00619> PMID: [31750644](https://pubmed.ncbi.nlm.nih.gov/31750644/)
51. Veaudor T, Cassier-Chauvat C, Chauvat F. Genomics of Urea Transport and Catabolism in Cyanobacteria: Biotechnological Implications. *Front Microbiol*. 2019;10:2052. <https://doi.org/10.3389/fmicb.2019.02052> PMID: [31551986](https://pubmed.ncbi.nlm.nih.gov/31551986/)
52. Cuthbertson L, Nodwell JR. The TetR family of regulators. *Microbiol Mol Biol Rev*. 2013;77(3):440–75. <https://doi.org/10.1128/MMBR.00018-13> PMID: [24006471](https://pubmed.ncbi.nlm.nih.gov/24006471/)
53. Tsang KL, Wong K-B. Moving nickel along the hydrogenase-urease maturation pathway. *Metallomics*. 2022;14(5):mfac003. <https://doi.org/10.1093/mtomcs/mfac003> PMID: [35556134](https://pubmed.ncbi.nlm.nih.gov/35556134/)
54. Mobley HL, Hausinger RP. Microbial ureases: significance, regulation, and molecular characterization. *Microbiol Rev*. 1989;53(1):85–108. <https://doi.org/10.1128/mr.53.1.85-108.1989> PMID: [2651866](https://pubmed.ncbi.nlm.nih.gov/2651866/)
55. Haas CE, Rodionov DA, Kropat J, Malasarn D, Merchant SS, de Crécy-Lagard V. A subset of the diverse COG0523 family of putative metal chaperones is linked to zinc homeostasis in all kingdoms of life. *BMC Genomics*. 2009;10:470. <https://doi.org/10.1186/1471-2164-10-470> PMID: [19822009](https://pubmed.ncbi.nlm.nih.gov/19822009/)
56. Pei P, Aslam M, Wang H, Ye P, Li T, Liang H, et al. Diversity and ecological function of urease-producing bacteria in the cultivation environment of *Gracilariopsis lemaneiformis*. *Microb Ecol*. 2024;87(1):35. <https://doi.org/10.1007/s00248-023-02339-y> PMID: [38261068](https://pubmed.ncbi.nlm.nih.gov/38261068/)
57. Costa FG, Horswill AR. Urease promotes pH homeostasis and growth of *Staphylococcus aureus* in skin-like conditions. *J Bacteriol*. 2025;207(10):e0020825. <https://doi.org/10.1128/jb.00208-25> PMID: [41128611](https://pubmed.ncbi.nlm.nih.gov/41128611/)
